# Supplementary material for: Extracellular Vesicles Enriched in hsa-miR-301a-3p and hsa-miR-1293 Dynamics in Clear Cell Renal Cell Carcinoma Patients: Potential Biomarkers of Metastatic Disease
Source: PubMed Central journal article supplement (PMC7352268; doi:10.3390/cancers12061450), 2020-06-02
Supplement: cancers-12-01450-s001.pdf [file cancers-12-01450-s001.pdf]

# Supplementary Materials: Extracellular Vesicles Enriched in hsa-miR-301a-3p and hsa-miR-1293 Dynamics in Clear Cell Renal Cell Carcinoma Patients: Potential Biomarkers of Metastatic Disease

**Table S1.** Association of EV-derived miRNA profile expression with Clinical-pathological characteristics of patients with localized disease (Group A).

| miRNA           | Hypertension    | Diabetes mellitus | Smokers vs Non-smokers | Smokers vs Ex-smokers | Tumor size > 7cm      |
|-----------------|-----------------|-------------------|------------------------|-----------------------|-----------------------|
| Hsa-miR-25-3p   | <i>P</i> =0.528 | <i>P</i> =0.356   | <i>P</i> =0.316        | <i>P</i> =0.422       | <i>P</i> =0.464       |
| Hsa-miR-126-5p  | <i>P</i> =0.528 | <i>P</i> =0.814   | <i>P</i> =0.108        | <i>P</i> =0.079       | <b><i>P</i>=0.013</b> |
| Hsa-miR-200c-3p | <i>P</i> =0.555 | <i>P</i> =0.633   | <i>P</i> =0.503        | <i>P</i> =0.617       | <i>P</i> =0.862       |
| Hsa-miR-210-3p  | <i>P</i> =0.382 | <i>P</i> =0.996   | <i>P</i> =0.211        | <b><i>P</i>=0.034</b> | <i>P</i> =0.679       |
| Hsa-miR-301a-3p | <i>P</i> =0.820 | <i>P</i> =0.682   | <i>P</i> =0.083        | <i>P</i> =0.120       | <i>P</i> =0.754       |
| Hsa-miR-1246    | <i>P</i> =0.958 | <i>P</i> =0.056   | <i>P</i> =0.770        | <i>P</i> =0.558       | <i>P</i> =0.572       |
| Hsa-miR-1293    | <i>P</i> =0.837 | <i>P</i> =0.373   | <b><i>P</i>=0.006</b>  | <i>P</i> =0.577       | <i>P</i> =0.194       |

**Table S2.** Hsa-miR-25-3p, hsa-miR-126-5p, hsa-miR-200c-3p and hsa-miR-301a-3p mRNA targets validated with strong evidence according miRTarBase V8.0.

| microRNA        | Validated targets                                                                                                                                                                                                                                                                                                                                                                                                                                                                                                                                  |
|-----------------|----------------------------------------------------------------------------------------------------------------------------------------------------------------------------------------------------------------------------------------------------------------------------------------------------------------------------------------------------------------------------------------------------------------------------------------------------------------------------------------------------------------------------------------------------|
| Hsa-miR-25-3p   | <i>WDR4, TP53, TNFSF10, TCEAL1, SMAD7, SEMA4C, RGS3, REV3L, RECK, PTEN, PRMT5, MDM2, MAPK2K4, LATS2, KLF4, KAT2B, HAND2, FBXW7, EZH2, ERBB2, DSC2, DHFR, CYP2B6, CPEB1, CDKN1C, CDH1, CCL26, BCL2L11, ATP2A2</i>                                                                                                                                                                                                                                                                                                                                   |
| Hsa-miR-126-5p  | <i>SLC45A3, SPRED1, PTPN7, ADAM9, MMP7, CXCL12, MYC, VEGFA, HOTAIR, CRK, CYLD</i>                                                                                                                                                                                                                                                                                                                                                                                                                                                                  |
| Hsa-miR-200c-3p | <i>ZNF217, ZFPM2, ZFPM1, ZEB2, ZEB1, XIAP, WDR37, VEGFA, VAC14, USP25, UBQLN1, TUBB3, TIMP2, TCF7L1, TBK1, SUZ12, SP1, SLC1A2, SIRT1, SHC1, SH3PXD2A, SEPT7, SEC23A, RPS6KB1, ROCK2, RNF2, RND3, RIND2, RHOA, RCOR3, RASSF2, PTPRD, PTPN13, PTEN, PRKCZ, PMAIP1, LEPR, KRAS, KLHL20, KLF9, KLF11, KDR, JAZF1, IKBKB, HOXB5, HFE, GEMIN2, GATA4, FOXO1, FN1, FLT1, FBLN5, ETS1, ERFF1, ERBIN, ELMO2, EFNA1, EDNRA, E2F3, DUSP1, DNMT3B, DNMT3A, DNAJC3, DLC1, CRKL, CFL2, CDK2, CDH11, CCNE2, BTC, BRD7, BMI1, BCL2, BAP1, ATRX, ADAM12, ACVR2B</i> |
| Hsa-miR-301a-3p | <i>MEOX12, NKRF, SERPINE1, SMAD4, RUNX3, BCL2L11, PTEN, UVRAG, SNIP1, MAP3K5, TIMP2, CDC14A</i>                                                                                                                                                                                                                                                                                                                                                                                                                                                    |

**Table S3.** Protein-protein-interaction (PPI) network clusters according to Marckov Clusterring (MCL) analysis.

| <b>Cluster</b> | <b>Clustered proteins</b>                                                                                                                                                                                                                                                                                                                                                  |
|----------------|----------------------------------------------------------------------------------------------------------------------------------------------------------------------------------------------------------------------------------------------------------------------------------------------------------------------------------------------------------------------------|
| Cluster 1      | <i>ZNF217, KLF9, RPS6KB1, KLF4, NOS3, TCF7L1, SUZ12, BRD7, E2F3, TCEAL1, RNF2, XIAP, SEC23A, ZEB1, ZEB2, KAT2B, SIRT1, ATRX, DNMT3A, DUSP1, DNMT3B, IKBKB, BMI1, PTEN, CDKN1C, EZH2, BAP1, PIN1, MDM2, BCL2, CDK2, SP1, CPEB1, DHFR, KLHL20, UVRAG, PMAIP1, BCL2L11, CYP2B6, FOXO1, PRKCZ, NOTCH1, DSC2, TP53, CCNE2, RUNX3, MAP3K5, TNFSF10, MYB, MYC, ETS1, SERPINE1</i> |
| Cluster 2      | <i>DLC1, RHOA, RND3, MSN, CFL2, MYLK</i>                                                                                                                                                                                                                                                                                                                                   |
| Cluster 3      | <i>KRAS, SPRED1, PTPRD, SHC1, RASSF2</i>                                                                                                                                                                                                                                                                                                                                   |
| Cluster 4      | <i>VEGFA, SEMA4C, TIMP2, EFNA1, LEPR</i>                                                                                                                                                                                                                                                                                                                                   |
| Cluster 5      | <i>HAND2, ATP2A2, GATA4, ZFPM1, ZFPM2</i>                                                                                                                                                                                                                                                                                                                                  |
| Cluster 6      | <i>ERBB2IP, ERBB2, BTC, ERFF1</i>                                                                                                                                                                                                                                                                                                                                          |
| Cluster 7      | <i>PTPN7, SEPT7, CDC14A</i>                                                                                                                                                                                                                                                                                                                                                |
| Cluster 8      | <i>ACVR2B, SMAD4, SNIP1</i>                                                                                                                                                                                                                                                                                                                                                |
| Cluster 9      | <i>PTPNI3, PDCD10, RGS3</i>                                                                                                                                                                                                                                                                                                                                                |
| Cluster 10     | <i>JAZF1, VAC14, SLC45A3</i>                                                                                                                                                                                                                                                                                                                                               |
| Cluster 11     | <i>NTF3, FLT1, KDR</i>                                                                                                                                                                                                                                                                                                                                                     |
| Cluster 12     | <i>CRK, ELMO2, CRKL</i>                                                                                                                                                                                                                                                                                                                                                    |
| Cluster 13     | <i>DNAJC3, MMP7, FN1</i>                                                                                                                                                                                                                                                                                                                                                   |
| Cluster 14     | <i>CCL26, CXCL12</i>                                                                                                                                                                                                                                                                                                                                                       |
| Cluster 15     | <i>RECK, SLC1A2</i>                                                                                                                                                                                                                                                                                                                                                        |
| Cluster 16     | <i>USP25, WDR4</i>                                                                                                                                                                                                                                                                                                                                                         |
| Cluster 17     | <i>NCAM1, TUBB3</i>                                                                                                                                                                                                                                                                                                                                                        |
| Cluster 18     | <i>UBQLN1, TBK1</i>                                                                                                                                                                                                                                                                                                                                                        |
| Cluster 19     | <i>CDH11, CDH1</i>                                                                                                                                                                                                                                                                                                                                                         |
| Cluster 20     | <i>KLF11, SMAD7</i>                                                                                                                                                                                                                                                                                                                                                        |
| Cluster 21     | <i>PRMT5, GEMIN2</i>                                                                                                                                                                                                                                                                                                                                                       |
| Cluster 22     | <i>REV3L, ADAM9</i>                                                                                                                                                                                                                                                                                                                                                        |
| Cluster 23     | <i>SH3PXD2A, ADAM12</i>                                                                                                                                                                                                                                                                                                                                                    |
| Cluster 24     | <i>RCOR3, HFE</i>                                                                                                                                                                                                                                                                                                                                                          |
| Cluster 25     | <i>FBLN5, RIN2</i>                                                                                                                                                                                                                                                                                                                                                         |
| Cluster 26     | <i>LPAR1, EDNRA</i>                                                                                                                                                                                                                                                                                                                                                        |

**Table S4.** Reactome pathway enrichment analysis for terms with FDR  $p$  value < 0.01.

| Number of genes | Term name   | Description                                                                               | FDR value |
|-----------------|-------------|-------------------------------------------------------------------------------------------|-----------|
| 23              | HSA-74160   | Gene expression (Transcription)                                                           | 9,20E-11  |
| 11              | HSA-2559583 | Cellular Senescence                                                                       | 1,85E-10  |
| 20              | HSA-212436  | Generic Transcription Pathway                                                             | 6,03E-10  |
| 27              | HSA-162582  | Signal Transduction                                                                       | 5,38E-09  |
| 8               | HSA-8878159 | Transcriptional regulation by RUNX3                                                       | 1,51E-08  |
| 13              | HSA-8953897 | Cellular responses to external stimuli                                                    | 1,51E-08  |
| 12              | HSA-2262752 | Cellular responses to stress                                                              | 2,40E-08  |
| 7               | HSA-2559580 | Oxidative Stress Induced Senescence                                                       | 3,72E-07  |
| 5               | HSA-2559585 | Oncogene Induced Senescence                                                               | 2,17E-06  |
| 5               | HSA-109606  | Intrinsic Pathway for Apoptosis                                                           | 6,61E-06  |
| 8               | HSA-1257604 | PIP3 activates AKT signaling                                                              | 1,09E-05  |
| 6               | HSA-212165  | Epigenetic regulation of gene expression                                                  | 2,51E-05  |
| 6               | HSA-9018519 | Estrogen-dependent gene expression                                                        | 2,65E-05  |
| 4               | HSA-114452  | Activation of BH3-only proteins                                                           | 4,21E-05  |
| 6               | HSA-6807070 | PTEN Regulation                                                                           | 4,68E-05  |
| 3               | HSA-111453  | BH3-only proteins associate with and inactivate anti-apoptotic BCL-2 members              | 6,23E-05  |
| 3               | HSA-4411364 | Binding of TCF/LEF:CTNNB1 to target gene promoters                                        | 6,23E-05  |
| 6               | HSA-453279  | Mitotic G1-G1/S phases                                                                    | 6,23E-05  |
| 3               | HSA-8951430 | RUNX3 regulates WNT signaling                                                             | 6,23E-05  |
| 6               | HSA-3108232 | SUMO E3 ligases SUMOylate target proteins                                                 | 7,61E-05  |
| 6               | HSA-109581  | Apoptosis                                                                                 | 9,24E-5   |
| 8               | HSA-3700989 | Transcriptional Regulation by TP53                                                        | 9,24E-5   |
| 4               | HSA-212300  | PRC2 methylates histones and DNA                                                          | 9,8E-5    |
| 5               | HSA-6785807 | Interleukin-4 and Interleukin-13 signaling                                                | 1,6E-4    |
| 3               | HSA-6804116 | TP53 Regulates Transcription of Genes Involved in G1 Cell Cycle Arrest                    | 1,6E-4    |
| 3               | HSA-8941856 | RUNX3 regulates NOTCH signaling                                                           | 1,6E-4    |
| 3               | HSA-4655427 | SUMOylation of DNA methylation proteins                                                   | 1,7E-4    |
| 4               | HSA-8943724 | Regulation of PTEN gene transcription                                                     | 2,9E-4    |
| 4               | HSA-1912408 | Pre-NOTCH Transcription and Translation                                                   | 3,4E-4    |
| 4               | HSA-69563   | p53-Dependent G1 DNA Damage Response                                                      | 3,4E-4    |
| 4               | HSA-170834  | Signaling by TGF-beta Receptor Complex                                                    | 5,0E-4    |
| 7               | HSA-5663202 | Diseases of signal transduction                                                           | 5,4E-4    |
| 13              | HSA-597592  | Post-translational protein modification                                                   | 5,5E-4    |
| 3               | HSA-1538133 | G0 and Early G1                                                                           | 6,5E-4    |
| 5               | HSA-5633007 | Regulation of TP53 Activity                                                               | 7,1E-4    |
| 3               | HSA-6804758 | Regulation of TP53 Activity through Acetylation                                           | 8,3E-4    |
| 2               | HSA-69200   | Phosphorylation of proteins involved in G1/S transition by active Cyclin E:Cdk2 complexes | 9,1E-4    |
| 3               | HSA-2173796 | SMAD2/SMAD3:SMAD4 heterotrimer regulates transcription                                    | 9,5E-4    |
| 6               | HSA-5688426 | Deubiquitination                                                                          | 9,5E-4    |
| 3               | HSA-8953750 | Transcriptional Regulation by E2F6                                                        | 9,5E-4    |
| 4               | HSA-6804756 | Regulation of TP53 Activity through Phosphorylation                                       | 0.001     |

**Table S5.** KEGG pathway enrichment analysis. Only the terms with FDR *P* value <0.01 were considered.

| Number of genes | Term name | Description                                          | FDR value |
|-----------------|-----------|------------------------------------------------------|-----------|
| 16              | hsa05206  | MicroRNAs in cancer                                  | 4,70E-19  |
| 18              | hsa05200  | Pathways in cancer                                   | 9,11E-14  |
| 11              | hsa05215  | Prostate cancer                                      | 2,43E-13  |
| 11              | hsa04218  | Cellular senescence                                  | 2,37E-11  |
| 9               | hsa05222  | Small cell lung cancer                               | 1,80E-10  |
| 12              | hsa04151  | PI3K-Akt signaling pathway                           | 3,82E-09  |
| 11              | hsa05165  | Human papillomavirus infection                       | 1,95E-08  |
| 7               | hsa04115  | p53 signaling pathway                                | 2,08E-08  |
| 8               | hsa04068  | FoxO signaling pathway                               | 5,12E-08  |
| 8               | hsa04210  | Apoptosis                                            | 6,11E-08  |
| 7               | hsa05210  | Colorectal cancer                                    | 6,46E-08  |
| 8               | hsa05161  | Hepatitis B                                          | 7,43E-08  |
| 8               | hsa05224  | Breast cancer                                        | 8,88E-08  |
| 8               | hsa05226  | Gastric cancer                                       | 8,88E-08  |
| 7               | hsa01522  | Endocrine resistance                                 | 9,79E-08  |
| 6               | hsa01524  | Platinum drug resistance                             | 4,77E-07  |
| 7               | hsa04110  | Cell cycle                                           | 4,77E-07  |
| 7               | hsa05418  | Fluid shear stress and atherosclerosis               | 7,33E-07  |
| 7               | hsa05225  | Hepatocellular carcinoma                             | 2,61E-06  |
| 8               | hsa05166  | HTLV-I infection                                     | 2,96E-06  |
| 6               | hsa04931  | Insulin resistance                                   | 3,89E-6   |
| 6               | hsa04919  | Thyroid hormone signaling pathway                    | 5,56E-6   |
| 6               | hsa04071  | Sphingolipid signaling pathway                       | 5,58E-6   |
| 4               | hsa04215  | Apoptosis - multiple species                         | 1,35E-5   |
| 5               | hsa05220  | Chronic myeloid leukemia                             | 1,45E-5   |
| 4               | hsa05219  | Bladder cancer                                       | 3,48E-5   |
| 6               | hsa05202  | Transcriptional misregulation in cancer              | 3,86E-5   |
| 5               | hsa04933  | AGE-RAGE signaling pathway in diabetic complications | 4,22E-5   |
| 6               | hsa05203  | Viral carcinogenesis                                 | 5,58E-5   |
| 6               | hsa05169  | Epstein-Barr virus infection                         | 7,43E-5   |
| 4               | hsa05213  | Endometrial cancer                                   | 1,1E-4    |
| 4               | hsa05221  | Acute myeloid leukemia                               | 1,7E-4    |
| 4               | hsa05214  | Glioma                                               | 1,8E-4    |
| 4               | hsa05218  | Melanoma                                             | 2,2E-4    |
| 4               | hsa05212  | Pancreatic cancer                                    | 2,3E-4    |
| 5               | hsa04934  | Cushing's syndrome                                   | 2,6E-4    |
| 4               | hsa01521  | EGFR tyrosine kinase inhibitor resistance            | 2,7E-4    |
| 4               | hsa04211  | Longevity regulating pathway                         | 4,1E-4    |
| 4               | hsa04066  | HIF-1 signaling pathway                              | 5,9E-4    |
| 3               | hsa05216  | Thyroid cancer                                       | 6,0E-4    |
| 4               | hsa04722  | Neurotrophin signaling pathway                       | 0,001     |

**Table S6.** Gene Ontology (GO) Cellular Components enrichment analysis. Only the terms with FDR  $p$  value  $< 0.01$  were considered.

| Number of genes | Term name  | Description                              | FDR value |
|-----------------|------------|------------------------------------------|-----------|
| 37              | GO.0005654 | nucleoplasm                              | 3,00E-14  |
| 39              | GO.0031981 | nuclear lumen                            | 3,00E-14  |
| 40              | GO.0070013 | intracellular organelle lumen            | 9,87E-12  |
| 44              | GO.0005634 | nucleus                                  | 5,05E-11  |
| 52              | GO.0043227 | membrane-bounded organelle               | 2,68E-10  |
| 50              | GO.0043231 | intracellular membrane-bounded organelle | 1,39E-09  |
| 47              | GO.0044446 | intracellular organelle part             | 1,55E-09  |
| 12              | GO.0000790 | nuclear chromatin                        | 2,63E-09  |
| 52              | GO.0043229 | intracellular organelle                  | 9,84E-09  |
| 15              | GO.0044427 | chromosomal part                         | 6,21E-08  |
| 5               | GO.0031519 | PcG protein complex                      | 7,95E-07  |
| 5               | GO.0005720 | nuclear heterochromatin                  | 9,89E-07  |
| 31              | GO.0032991 | protein-containing complex               | 1,91E-06  |
| 31              | GO.0005829 | cytosol                                  | 4,14E-06  |
| 4               | GO.0000803 | sex chromosome                           | 2,02E-05  |
| 4               | GO.0000791 | euchromatin                              | 2,68E-05  |
| 11              | GO.1990234 | transferase complex                      | 3,52E-05  |
| 11              | GO.0016604 | nuclear body                             | 4,12E-05  |
| 13              | GO.0044451 | nucleoplasm part                         | 4,17E-05  |
| 5               | GO.0016605 | PML body                                 | 7,59E-05  |
| 45              | GO.0005737 | cytoplasm                                | 1.6E-4    |
| 7               | GO.0005667 | transcription factor complex             | 2.5E-4    |
| 2               | GO.0097135 | cyclin E2-CDK2 complex                   | 3.5E-4    |
| 53              | GO.0044464 | cell part                                | 4.2E-4    |
| 4               | GO.1902911 | protein kinase complex                   | 7.0E-4    |

**Table S7.** Gene Ontology (GO) Biological data enrichment analysis. Only the terms with FDR  $p$  value  $< 0.01$  were considered.

| Number of genes | Term name  | Description                                                        | FDR value |
|-----------------|------------|--------------------------------------------------------------------|-----------|
| 31              | GO.0042127 | regulation of cell population proliferation                        | 5,21E-17  |
| 48              | GO.0051171 | regulation of nitrogen compound metabolic process                  | 5,21E-17  |
| 43              | GO.0031326 | regulation of cellular biosynthetic process                        | 7,62E-17  |
| 39              | GO.0009893 | positive regulation of metabolic process                           | 7,95E-17  |
| 48              | GO.0031323 | regulation of cellular metabolic process                           | 7,95E-17  |
| 35              | GO.0031324 | negative regulation of cellular metabolic process                  | 7,95E-17  |
| 38              | GO.0031325 | positive regulation of cellular metabolic process                  | 7,95E-17  |
| 27              | GO.0051726 | regulation of cell cycle                                           | 7,95E-17  |
| 48              | GO.0060255 | regulation of macromolecule metabolic process                      | 7,95E-17  |
| 48              | GO.0080090 | regulation of primary metabolic process                            | 7,95E-17  |
| 42              | GO.2000112 | regulation of cellular macromolecule biosynthetic process          | 7,95E-17  |
| 34              | GO.0051172 | negative regulation of nitrogen compound metabolic process         | 8,53E-17  |
| 43              | GO.0048523 | negative regulation of cellular process                            | 8,56E-17  |
| 37              | GO.0051173 | positive regulation of nitrogen compound metabolic process         | 1,01E-16  |
| 37              | GO.0010604 | positive regulation of macromolecule metabolic process             | 4,36E-16  |
| 20              | GO.0045786 | negative regulation of cell cycle                                  | 5,86E-16  |
| 41              | GO.0019219 | regulation of nucleobase-containing compound metabolic process     | 6,42E-16  |
| 34              | GO.0032268 | regulation of cellular protein metabolic process                   | 6,42E-16  |
| 17              | GO.0035690 | cellular response to drug                                          | 1,02E-15  |
| 27              | GO.2000113 | negative regulation of cellular macromolecule biosynthetic process | 1,17E-15  |
| 34              | GO.0010605 | negative regulation of macromolecule metabolic process             | 1.19E-15  |
| 42              | GO.0010468 | regulation of gene expression                                      | 1.29E-15  |

|    |            |                                                                         |          |
|----|------------|-------------------------------------------------------------------------|----------|
| 27 | GO.1901700 | response to oxygen-containing compound                                  | 3.81E-15 |
| 39 | GO.0051252 | regulation of RNA metabolic process                                     | 5.82E-15 |
| 38 | GO.0006355 | regulation of transcription, DNA-templated                              | 7.36E-15 |
| 34 | GO.0010033 | response to organic substance                                           | 1.55E-14 |
| 33 | GO.0006357 | regulation of transcription by RNA polymerase II                        | 2.09E-14 |
| 23 | GO.1901698 | response to nitrogen compound                                           | 2.09E-14 |
| 27 | GO.0033554 | cellular response to stress                                             | 2.23E-14 |
| 22 | GO.1901701 | cellular response to oxygen-containing compound                         | 3.77E-14 |
| 22 | GO.0042493 | response to drug                                                        | 4.03E-14 |
| 21 | GO.0000122 | negative regulation of transcription by RNA polymerase II               | 7.01E-14 |
| 27 | GO.0010941 | regulation of cell death                                                | 7.5E-14  |
| 28 | GO.0010628 | positive regulation of gene expression                                  | 9.96E-14 |
| 26 | GO.0042981 | regulation of apoptotic process                                         | 9.98E-14 |
| 27 | GO.0010629 | negative regulation of gene expression                                  | 1.13E-13 |
| 41 | GO.0048522 | positive regulation of cellular process                                 | 1.41E-13 |
| 25 | GO.0045934 | negative regulation of nucleobase-containing compound metabolic process | 3.09E-13 |
| 23 | GO.0045892 | negative regulation of transcription, DNA-templated                     | 5.54E-13 |
| 42 | GO.0048518 | positive regulation of biological process                               | 7.81E-13 |
| 14 | GO.0010948 | negative regulation of cell cycle process                               | 1.25E-12 |
| 11 | GO.0071236 | cellular response to antibiotic                                         | 1.28E-12 |
| 31 | GO.0070887 | cellular response to chemical stimulus                                  | 1.94E-12 |
| 12 | GO.0071453 | cellular response to oxygen levels                                      | 1.94E-12 |
| 26 | GO.0031399 | regulation of protein modification process                              | 2.73E-12 |
| 44 | GO.0044260 | cellular macromolecule metabolic process                                | 3.7E-12  |
| 23 | GO.0051253 | negative regulation of RNA metabolic process                            | 4.45E-12 |
| 14 | GO.0046677 | response to antibiotic                                                  | 4.57E-12 |
| 18 | GO.0008285 | negative regulation of cell population proliferation                    | 5.03E-12 |
| 12 | GO.0000302 | response to reactive oxygen species                                     | 8.51E-12 |
| 14 | GO.0070482 | response to oxygen levels                                               | 8.51E-12 |
| 23 | GO.0009719 | response to endogenous stimulus                                         | 8.95E-12 |
| 16 | GO.0010035 | response to inorganic substance                                         | 8.95E-12 |
| 28 | GO.0050790 | regulation of catalytic activity                                        | 1.21E-11 |
| 36 | GO.0042221 | response to chemical                                                    | 1.83E-11 |
| 19 | GO.0009725 | response to hormone                                                     | 2.14E-11 |
| 19 | GO.0043066 | negative regulation of apoptotic process                                | 2.33E-11 |
| 24 | GO.0051247 | positive regulation of protein metabolic process                        | 2.4E-11  |
| 19 | GO.0010243 | response to organonitrogen compound                                     | 3.14E-11 |
| 10 | GO.0042542 | response to hydrogen peroxide                                           | 3.78E-11 |
| 13 | GO.0001666 | response to hypoxia                                                     | 3.95E-11 |
| 12 | GO.0034599 | cellular response to oxidative stress                                   | 4.31E-11 |
| 32 | GO.0006950 | response to stress                                                      | 4.56E-11 |
| 17 | GO.0010942 | positive regulation of cell death                                       | 4.83E-11 |
| 14 | GO.0006979 | response to oxidative stress                                            | 4.9E-11  |
| 23 | GO.0032270 | positive regulation of cellular protein metabolic process               | 5.71E-11 |
| 15 | GO.0009636 | response to toxic substance                                             | 5.84E-11 |
| 16 | GO.1901699 | cellular response to nitrogen compound                                  | 6.06E-11 |
| 17 | GO.0010564 | regulation of cell cycle process                                        | 7.3E-11  |
| 10 | GO.0034614 | cellular response to reactive oxygen species                            | 8.52E-11 |
| 34 | GO.0048583 | regulation of response to stimulus                                      | 1.04E-10 |
| 27 | GO.0051128 | regulation of cellular component organization                           | 1.38E-10 |
| 16 | GO.0043065 | positive regulation of apoptotic process                                | 1.4E-10  |
| 21 | GO.0007049 | cell cycle                                                              | 1.63E-10 |
| 51 | GO.0050794 | regulation of cellular process                                          | 1.64E-10 |
| 24 | GO.0045935 | positive regulation of nucleobase-containing compound metabolic process | 1.86E-10 |

|    |            |                                                              |          |
|----|------------|--------------------------------------------------------------|----------|
| 23 | GO.0051254 | positive regulation of RNA metabolic process                 | 1.86E-10 |
| 22 | GO.0045893 | positive regulation of transcription, DNA-templated          | 1.94E-10 |
| 11 | GO.0097237 | cellular response to toxic substance                         | 2.15E-10 |
| 10 | GO.0071456 | cellular response to hypoxia                                 | 2.17E-10 |
| 30 | GO.0009966 | regulation of signal transduction                            | 2.63E-10 |
| 27 | GO.0050793 | regulation of developmental process                          | 3.67E-10 |
| 26 | GO.0071310 | cellular response to organic substance                       | 3.81E-10 |
| 31 | GO.0010646 | regulation of cell communication                             | 4.08E-10 |
| 24 | GO.0031328 | positive regulation of cellular biosynthetic process         | 4.09E-10 |
| 8  | GO.0070301 | cellular response to hydrogen peroxide                       | 5.0E-10  |
| 31 | GO.0023051 | regulation of signaling                                      | 5.14E-10 |
| 23 | GO.0045595 | regulation of cell differentiation                           | 5.42E-10 |
| 46 | GO.0006807 | nitrogen compound metabolic process                          | 9.9E-10  |
| 17 | GO.0033993 | response to lipid                                            | 9.9E-10  |
| 47 | GO.0044237 | cellular metabolic process                                   | 9.9E-10  |
| 23 | GO.0010557 | positive regulation of macromolecule biosynthetic process    | 1.07E-9  |
| 19 | GO.0071495 | cellular response to endogenous stimulus                     | 1.08E-9  |
| 23 | GO.1902531 | regulation of intracellular signal transduction              | 1.13E-9  |
| 20 | GO.0051094 | positive regulation of developmental process                 | 1.6E-9   |
| 40 | GO.0051716 | cellular response to stimulus                                | 2.2E-9   |
| 13 | GO.1901652 | response to peptide                                          | 3.21E-9  |
| 23 | GO.2000026 | regulation of multicellular organismal development           | 3.68E-9  |
| 18 | GO.0009628 | response to abiotic stimulus                                 | 4.14E-9  |
| 47 | GO.0071704 | organic substance metabolic process                          | 4.36E-9  |
| 46 | GO.0044238 | primary metabolic process                                    | 7.81E-9  |
| 27 | GO.0051239 | regulation of multicellular organismal process               | 7.93E-9  |
| 8  | GO.2000134 | negative regulation of G1/S transition of mitotic cell cycle | 9.01E-9  |
| 17 | GO.0051338 | regulation of transferase activity                           | 9.38E-9  |
| 14 | GO.0032870 | cellular response to hormone stimulus                        | 1.0E-8   |
| 13 | GO.0071417 | cellular response to organonitrogen compound                 | 1.21E-8  |
| 29 | GO.0065009 | regulation of molecular function                             | 1.24E-8  |
| 12 | GO.2001233 | regulation of apoptotic signaling pathway                    | 1.27E-8  |
| 20 | GO.0042325 | regulation of phosphorylation                                | 1.38E-8  |
| 14 | GO.0007346 | regulation of mitotic cell cycle                             | 1.56E-8  |
| 21 | GO.0019220 | regulation of phosphate metabolic process                    | 1.64E-8  |
| 28 | GO.0006996 | organelle organization                                       | 1.72E-8  |
| 9  | GO.1902806 | regulation of cell cycle G1/S phase transition               | 1.74E-8  |
| 16 | GO.0014070 | response to organic cyclic compound                          | 1.84E-8  |
| 17 | GO.0032269 | negative regulation of cellular protein metabolic process    | 1.84E-8  |
| 16 | GO.0008284 | positive regulation of cell population proliferation         | 1.99E-8  |
| 43 | GO.0050896 | response to stimulus                                         | 2.39E-8  |
| 35 | GO.0048856 | anatomical structure development                             | 2.57E-8  |
| 28 | GO.0043412 | macromolecule modification                                   | 2.63E-8  |
| 10 | GO.0045930 | negative regulation of mitotic cell cycle                    | 2.65E-8  |
| 19 | GO.0001932 | regulation of protein phosphorylation                        | 3.0E-8   |
| 10 | GO.0048511 | rhythmic process                                             | 3.4E-8   |
| 14 | GO.0006325 | chromatin organization                                       | 6.02E-8  |
| 17 | GO.0045944 | positive regulation of transcription by RNA polymerase II    | 6.02E-8  |
| 12 | GO.0031667 | response to nutrient levels                                  | 6.31E-8  |
| 17 | GO.0044092 | negative regulation of molecular function                    | 7.21E-8  |
| 33 | GO.0007275 | multicellular organism development                           | 8.94E-8  |
| 18 | GO.0080134 | regulation of response to stress                             | 9.02E-8  |
| 22 | GO.0048584 | positive regulation of response to stimulus                  | 1.08E-7  |
| 16 | GO.0051276 | chromosome organization                                      | 1.1E-7   |
| 17 | GO.0033043 | regulation of organelle organization                         | 1.12E-7  |
| 30 | GO.0090304 | nucleic acid metabolic process                               | 1.17E-7  |

|    |            |                                                                                  |         |
|----|------------|----------------------------------------------------------------------------------|---------|
| 17 | GO.0009968 | negative regulation of signal transduction                                       | 1.18E-7 |
| 9  | GO.0043281 | regulation of cysteine-type endopeptidase activity involved in apoptotic process | 1.2E-7  |
| 10 | GO.1901653 | cellular response to peptide                                                     | 1.2E-7  |
| 9  | GO.0032868 | response to insulin                                                              | 1.37E-7 |
| 15 | GO.0022402 | cell cycle process                                                               | 1.78E-7 |
| 19 | GO.0051240 | positive regulation of multicellular organismal process                          | 1.99E-7 |
| 24 | GO.0006351 | transcription, DNA-templated                                                     | 2.11E-7 |
| 8  | GO.0031960 | response to corticosteroid                                                       | 2.11E-7 |
| 15 | GO.0045597 | positive regulation of cell differentiation                                      | 2.24E-7 |
| 15 | GO.0051093 | negative regulation of developmental process                                     | 2.29E-7 |
| 6  | GO.2001244 | positive regulation of intrinsic apoptotic signaling pathway                     | 2.74E-7 |
| 33 | GO.1901360 | organic cyclic compound metabolic process                                        | 2.87E-7 |
| 14 | GO.0043086 | negative regulation of catalytic activity                                        | 4.11E-7 |
| 19 | GO.0010647 | positive regulation of cell communication                                        | 4.13E-7 |
| 8  | GO.2001235 | positive regulation of apoptotic signaling pathway                               | 4.25E-7 |
| 12 | GO.0010638 | positive regulation of organelle organization                                    | 4.26E-7 |
| 32 | GO.0006725 | cellular aromatic compound metabolic process                                     | 4.33E-7 |
| 19 | GO.0023056 | positive regulation of signaling                                                 | 4.33E-7 |
| 18 | GO.0048585 | negative regulation of response to stimulus                                      | 5.72E-7 |
| 18 | GO.0009967 | positive regulation of signal transduction                                       | 6.3E-7  |
| 16 | GO.0031401 | positive regulation of protein modification process                              | 6.34E-7 |
| 33 | GO.0016043 | cellular component organization                                                  | 7.5E-7  |
| 25 | GO.0006464 | cellular protein modification process                                            | 7.71E-7 |
| 10 | GO.0043434 | response to peptide hormone                                                      | 7.87E-7 |
| 12 | GO.0031400 | negative regulation of protein modification process                              | 8.52E-7 |
| 27 | GO.0034645 | cellular macromolecule biosynthetic process                                      | 8.73E-7 |
| 27 | GO.0044271 | cellular nitrogen compound biosynthetic process                                  | 9.23E-7 |
| 15 | GO.0012501 | programmed cell death                                                            | 1.18E-6 |
| 17 | GO.0043085 | positive regulation of catalytic activity                                        | 1.19E-6 |
| 7  | GO.1901796 | regulation of signal transduction by p53 class mediator                          | 1.19E-6 |
| 13 | GO.0006974 | cellular response to DNA damage stimulus                                         | 1.24E-6 |
| 12 | GO.0080135 | regulation of cellular response to stress                                        | 1.3E-6  |
| 10 | GO.1901987 | regulation of cell cycle phase transition                                        | 1.31E-6 |
| 25 | GO.0018130 | heterocycle biosynthetic process                                                 | 1.36E-6 |
| 25 | GO.0019438 | aromatic compound biosynthetic process                                           | 1.39E-6 |
| 27 | GO.0044267 | cellular protein metabolic process                                               | 1.39E-6 |
| 31 | GO.0046483 | heterocycle metabolic process                                                    | 1.46E-6 |
| 8  | GO.0031669 | cellular response to nutrient levels                                             | 1.49E-6 |
| 10 | GO.0052548 | regulation of endopeptidase activity                                             | 1.54E-6 |
| 14 | GO.0006915 | apoptotic process                                                                | 1.58E-6 |
| 16 | GO.0051336 | regulation of hydrolase activity                                                 | 1.58E-6 |
| 7  | GO.0009267 | cellular response to starvation                                                  | 1.64E-6 |
| 7  | GO.0051384 | response to glucocorticoid                                                       | 1.71E-6 |
| 6  | GO.0043502 | regulation of muscle adaptation                                                  | 1.74E-6 |
| 21 | GO.0051704 | multi-organism process                                                           | 1.76E-6 |
| 6  | GO.1901216 | positive regulation of neuron death                                              | 2.25E-6 |
| 9  | GO.0050678 | regulation of epithelial cell proliferation                                      | 2.38E-6 |
| 32 | GO.0034641 | cellular nitrogen compound metabolic process                                     | 2.42E-6 |
| 14 | GO.1902533 | positive regulation of intracellular signal transduction                         | 2.64E-6 |
| 6  | GO.0043535 | regulation of blood vessel endothelial cell migration                            | 2.66E-6 |
| 7  | GO.0010212 | response to ionizing radiation                                                   | 2.68E-6 |
| 10 | GO.0001933 | negative regulation of protein phosphorylation                                   | 2.71E-6 |
| 30 | GO.0044249 | cellular biosynthetic process                                                    | 2.74E-6 |
| 6  | GO.0010822 | positive regulation of mitochondrion organization                                | 2.79E-6 |
| 15 | GO.0051130 | positive regulation of cellular component organization                           | 2.81E-6 |



|    |            |                                                                                           |         |
|----|------------|-------------------------------------------------------------------------------------------|---------|
| 25 | GO.1901362 | organic cyclic compound biosynthetic process                                              | 2.81E-6 |
| 53 | GO.0009987 | cellular process                                                                          | 2.96E-6 |
| 9  | GO.0001101 | response to acid chemical                                                                 | 3.07E-6 |
| 7  | GO.0032869 | cellular response to insulin stimulus                                                     | 3.08E-6 |
| 9  | GO.0048545 | response to steroid hormone                                                               | 3.12E-6 |
| 12 | GO.0045596 | negative regulation of cell differentiation                                               | 3.22E-6 |
| 7  | GO.2001236 | regulation of extrinsic apoptotic signaling pathway                                       | 3.71E-6 |
| 11 | GO.0045936 | negative regulation of phosphate metabolic process                                        | 3.81E-6 |
| 7  | GO.2001242 | regulation of intrinsic apoptotic signaling pathway                                       | 3.84E-6 |
| 18 | GO.0044093 | positive regulation of molecular function                                                 | 3.85E-6 |
| 13 | GO.0060284 | regulation of cell development                                                            | 4.1E-6  |
| 5  | GO.0043525 | positive regulation of neuron apoptotic process                                           | 4.21E-6 |
| 13 | GO.0043549 | regulation of kinase activity                                                             | 4.23E-6 |
| 8  | GO.0071375 | cellular response to peptide hormone stimulus                                             | 4.53E-6 |
| 12 | GO.0043408 | regulation of MAPK cascade                                                                | 4.75E-6 |
| 9  | GO.0045862 | positive regulation of proteolysis                                                        | 5.16E-6 |
| 28 | GO.0048731 | system development                                                                        | 5.17E-6 |
| 9  | GO.1901990 | regulation of mitotic cell cycle phase transition                                         | 5.59E-6 |
| 9  | GO.0016569 | covalent chromatin modification                                                           | 6.39E-6 |
| 13 | GO.0051270 | regulation of cellular component movement                                                 | 6.58E-6 |
| 19 | GO.0009653 | anatomical structure morphogenesis                                                        | 6.74E-6 |
| 4  | GO.0051570 | regulation of histone H3-K9 methylation                                                   | 6.79E-6 |
| 5  | GO.0071385 | cellular response to glucocorticoid stimulus                                              | 6.8E-6  |
| 12 | GO.0030162 | regulation of proteolysis                                                                 | 6.97E-6 |
| 7  | GO.1904018 | positive regulation of vasculature development                                            | 7.65E-6 |
| 5  | GO.1902041 | regulation of extrinsic apoptotic signaling pathway via death domain receptors            | 7.94E-6 |
| 25 | GO.0016070 | RNA metabolic process                                                                     | 7.97E-6 |
| 11 | GO.0035239 | tube morphogenesis                                                                        | 8.31E-6 |
| 10 | GO.0071900 | regulation of protein serine/threonine kinase activity                                    | 8.51E-6 |
| 11 | GO.0051347 | positive regulation of transferase activity                                               | 1.04E-5 |
| 6  | GO.0045814 | negative regulation of gene expression, epigenetic                                        | 1.1E-5  |
| 18 | GO.0009605 | response to external stimulus                                                             | 1.13E-5 |
| 12 | GO.0006366 | transcription by RNA polymerase II                                                        | 1.19E-5 |
| 7  | GO.0048872 | homeostasis of number of cells                                                            | 1.2E-5  |
| 12 | GO.0045859 | regulation of protein kinase activity                                                     | 1.25E-5 |
| 13 | GO.0070647 | protein modification by small protein conjugation or removal                              | 1.26E-5 |
| 12 | GO.0035295 | tube development                                                                          | 1.32E-5 |
| 8  | GO.1901214 | regulation of neuron death                                                                | 1.33E-5 |
| 10 | GO.0044057 | regulation of system process                                                              | 1.35E-5 |
| 6  | GO.0043280 | positive regulation of cysteine-type endopeptidase activity involved in apoptotic process | 1.41E-5 |
| 29 | GO.1901576 | organic substance biosynthetic process                                                    | 1.43E-5 |
| 25 | GO.0065008 | regulation of biological quality                                                          | 1.53E-5 |
| 12 | GO.2000145 | regulation of cell motility                                                               | 1.55E-5 |
| 6  | GO.0032355 | response to estradiol                                                                     | 1.59E-5 |
| 6  | GO.0048660 | regulation of smooth muscle cell proliferation                                            | 1.59E-5 |
| 6  | GO.0072331 | signal transduction by p53 class mediator                                                 | 1.72E-5 |
| 9  | GO.1903706 | regulation of hemopoiesis                                                                 | 1.83E-5 |
| 7  | GO.0010632 | regulation of epithelial cell migration                                                   | 1.91E-5 |
| 16 | GO.0035556 | intracellular signal transduction                                                         | 1.93E-5 |
| 4  | GO.0090200 | positive regulation of release of cytochrome c from mitochondria                          | 1.94E-5 |
| 6  | GO.0031056 | regulation of histone modification                                                        | 2.18E-5 |
| 9  | GO.0009314 | response to radiation                                                                     | 2.3E-5  |
| 8  | GO.0033044 | regulation of chromosome organization                                                     | 2.3E-5  |
| 6  | GO.0030856 | regulation of epithelial cell differentiation                                             | 2.43E-5 |

|    |            |                                                                                                   |         |
|----|------------|---------------------------------------------------------------------------------------------------|---------|
| 4  | GO.1903749 | positive regulation of establishment of protein localization to mitochondrion                     | 2.43E-5 |
| 7  | GO.2001234 | negative regulation of apoptotic signaling pathway                                                | 2.43E-5 |
| 6  | GO.0009411 | response to UV                                                                                    | 2.61E-5 |
| 9  | GO.0051346 | negative regulation of hydrolase activity                                                         | 2.84E-5 |
| 7  | GO.0090257 | regulation of muscle system process                                                               | 2.84E-5 |
| 5  | GO.0034644 | cellular response to UV                                                                           | 2.98E-5 |
| 25 | GO.0010467 | gene expression                                                                                   | 3.48E-5 |
| 9  | GO.0030335 | positive regulation of cell migration                                                             | 3.6E-5  |
| 6  | GO.0051147 | regulation of muscle cell differentiation                                                         | 3.6E-5  |
| 6  | GO.0007050 | cell cycle arrest                                                                                 | 3.71E-5 |
| 15 | GO.0048699 | generation of neurons                                                                             | 3.79E-5 |
| 4  | GO.0051443 | positive regulation of ubiquitin-protein transferase activity                                     | 3.98E-5 |
| 34 | GO.0032501 | multicellular organismal process                                                                  | 4.2E-5  |
| 8  | GO.0016570 | histone modification                                                                              | 4.53E-5 |
| 5  | GO.0031058 | positive regulation of histone modification                                                       | 4.53E-5 |
| 20 | GO.0032879 | regulation of localization                                                                        | 4.55E-5 |
| 5  | GO.0097327 | response to antineoplastic agent                                                                  | 4.72E-5 |
| 11 | GO.0030334 | regulation of cell migration                                                                      | 4.79E-5 |
| 6  | GO.0043409 | negative regulation of MAPK cascade                                                               | 4.97E-5 |
| 6  | GO.0097193 | intrinsic apoptotic signaling pathway                                                             | 4.97E-5 |
| 6  | GO.2001252 | positive regulation of chromosome organization                                                    | 5.28E-5 |
| 5  | GO.1901655 | cellular response to ketone                                                                       | 5.43E-5 |
| 7  | GO.0040029 | regulation of gene expression, epigenetic                                                         | 5.46E-5 |
| 11 | GO.0048609 | multicellular organismal reproductive process                                                     | 5.5E-5  |
| 6  | GO.0045766 | positive regulation of angiogenesis                                                               | 5.58E-5 |
| 4  | GO.0070317 | negative regulation of G0 to G1 transition                                                        | 5.58E-5 |
| 10 | GO.0003006 | developmental process involved in reproduction                                                    | 5.82E-5 |
| 7  | GO.0007568 | aging                                                                                             | 5.9E-5  |
| 9  | GO.0071396 | cellular response to lipid                                                                        | 5.9E-5  |
| 9  | GO.0001944 | vasculature development                                                                           | 5.96E-5 |
| 3  | GO.0014745 | negative regulation of muscle adaptation                                                          | 6.09E-5 |
| 3  | GO.1902237 | positive regulation of endoplasmic reticulum stress-induced intrinsic apoptotic signaling pathway | 6.09E-5 |
| 10 | GO.0000278 | mitotic cell cycle                                                                                | 6.17E-5 |
| 9  | GO.0010720 | positive regulation of cell development                                                           | 6.25E-5 |
| 12 | GO.0022603 | regulation of anatomical structure morphogenesis                                                  | 7.5E-5  |
| 9  | GO.0070848 | response to growth factor                                                                         | 7.88E-5 |
| 8  | GO.0051052 | regulation of DNA metabolic process                                                               | 7.99E-5 |
| 9  | GO.1902532 | negative regulation of intracellular signal transduction                                          | 8.7E-5  |
| 4  | GO.0006306 | DNA methylation                                                                                   | 8.74E-5 |
| 7  | GO.0070372 | regulation of ERK1 and ERK2 cascade                                                               | 8.75E-5 |
| 14 | GO.0022414 | reproductive process                                                                              | 9.18E-5 |
| 7  | GO.0045765 | regulation of angiogenesis                                                                        | 9.3E-5  |
| 18 | GO.0007166 | cell surface receptor signaling pathway                                                           | 9.37E-5 |
| 5  | GO.2001237 | negative regulation of extrinsic apoptotic signaling pathway                                      | 9.57E-5 |
| 18 | GO.0007399 | nervous system development                                                                        | 9.79E-5 |
| 21 | GO.0048513 | animal organ development                                                                          | 9.81E-5 |
| 6  | GO.1901654 | response to ketone                                                                                | 9.86E-5 |
| 11 | GO.0048646 | anatomical structure formation involved in morphogenesis                                          | 1.1E-4  |
| 14 | GO.0002682 | regulation of immune system process                                                               | 1.2E-4  |
| 7  | GO.0009416 | response to light stimulus                                                                        | 1.2E-4  |
| 11 | GO.0018193 | peptidyl-amino acid modification                                                                  | 1.2E-4  |
| 8  | GO.0048608 | reproductive structure development                                                                | 1.2E-4  |
| 5  | GO.0031398 | positive regulation of protein ubiquitination                                                     | 1.4E-4  |
| 12 | GO.0034097 | response to cytokine                                                                              | 1.4E-4  |

|    |            |                                                                                                              |        |
|----|------------|--------------------------------------------------------------------------------------------------------------|--------|
| 6  | GO.0043523 | regulation of neuron apoptotic process                                                                       | 1.4E-4 |
| 3  | GO.0048070 | regulation of developmental pigmentation                                                                     | 1.4E-4 |
| 6  | GO.0008406 | gonad development                                                                                            | 1.5E-4 |
| 23 | GO.0048869 | cellular developmental process                                                                               | 1.5E-4 |
| 15 | GO.0009888 | tissue development                                                                                           | 1.6E-4 |
| 4  | GO.0010332 | response to gamma radiation                                                                                  | 1.6E-4 |
| 4  | GO.0043536 | positive regulation of blood vessel endothelial cell migration                                               | 1.6E-4 |
| 8  | GO.0050769 | positive regulation of neurogenesis                                                                          | 1.6E-4 |
| 29 | GO.1901564 | organonitrogen compound metabolic process                                                                    | 1.6E-4 |
| 12 | GO.0045937 | positive regulation of phosphate metabolic process                                                           | 1.7E-4 |
| 9  | GO.0016032 | viral process                                                                                                | 1.8E-4 |
| 5  | GO.0000082 | G1/S transition of mitotic cell cycle                                                                        | 1.9E-4 |
| 5  | GO.0050680 | negative regulation of epithelial cell proliferation                                                         | 1.9E-4 |
| 10 | GO.0050767 | regulation of neurogenesis                                                                                   | 1.9E-4 |
| 4  | GO.0010660 | regulation of muscle cell apoptotic process                                                                  | 2.1E-4 |
| 4  | GO.0014910 | regulation of smooth muscle cell migration                                                                   | 2.2E-4 |
| 5  | GO.0016202 | regulation of striated muscle tissue development                                                             | 2.2E-4 |
| 3  | GO.1902170 | cellular response to reactive nitrogen species                                                               | 2.2E-4 |
| 9  | GO.0045664 | regulation of neuron differentiation                                                                         | 2.4E-4 |
| 12 | GO.0051241 | negative regulation of multicellular organismal process                                                      | 2.4E-4 |
| 5  | GO.0071901 | negative regulation of protein serine/threonine kinase activity                                              | 2.4E-4 |
| 6  | GO.0090092 | regulation of transmembrane receptor protein serine/threonine kinase signaling pathway                       | 2.4E-4 |
| 11 | GO.0044703 | multi-organism reproductive process                                                                          | 2.5E-4 |
| 8  | GO.0001568 | blood vessel development                                                                                     | 2.7E-4 |
| 10 | GO.0019953 | sexual reproduction                                                                                          | 2.7E-4 |
| 4  | GO.0070373 | negative regulation of ERK1 and ERK2 cascade                                                                 | 2.7E-4 |
| 8  | GO.1903827 | regulation of cellular protein localization                                                                  | 2.8E-4 |
| 4  | GO.0001776 | leukocyte homeostasis                                                                                        | 2.9E-4 |
| 11 | GO.0001934 | positive regulation of protein phosphorylation                                                               | 2.9E-4 |
| 4  | GO.0007569 | cell aging                                                                                                   | 2.9E-4 |
| 7  | GO.0048589 | developmental growth                                                                                         | 2.9E-4 |
| 5  | GO.0007623 | circadian rhythm                                                                                             | 3.0E-4 |
| 2  | GO.0014740 | negative regulation of muscle hyperplasia                                                                    | 3.2E-4 |
| 22 | GO.0030154 | cell differentiation                                                                                         | 3.3E-4 |
| 9  | GO.0030155 | regulation of cell adhesion                                                                                  | 3.3E-4 |
| 4  | GO.0045844 | positive regulation of striated muscle tissue development                                                    | 3.3E-4 |
| 9  | GO.0007276 | gamete generation                                                                                            | 3.6E-4 |
| 4  | GO.0008630 | intrinsic apoptotic signaling pathway in response to DNA damage                                              | 3.6E-4 |
| 4  | GO.0046902 | regulation of mitochondrial membrane permeability                                                            | 3.6E-4 |
| 9  | GO.0051129 | negative regulation of cellular component organization                                                       | 3.6E-4 |
| 3  | GO.0010661 | positive regulation of muscle cell apoptotic process                                                         | 3.8E-4 |
| 9  | GO.0016567 | protein ubiquitination                                                                                       | 4.1E-4 |
| 10 | GO.0072359 | circulatory system development                                                                               | 4.1E-4 |
| 3  | GO.0032461 | positive regulation of protein oligomerization                                                               | 4.2E-4 |
| 3  | GO.1900740 | positive regulation of protein insertion into mitochondrial membrane involved in apoptotic signaling pathway | 4.2E-4 |
| 6  | GO.0031647 | regulation of protein stability                                                                              | 4.6E-4 |
| 8  | GO.0071407 | cellular response to organic cyclic compound                                                                 | 4.6E-4 |
| 6  | GO.2000146 | negative regulation of cell motility                                                                         | 4.8E-4 |
| 9  | GO.0040008 | regulation of growth                                                                                         | 4.9E-4 |
| 6  | GO.0090287 | regulation of cellular response to growth factor stimulus                                                    | 4.9E-4 |
| 2  | GO.0072717 | cellular response to actinomycin D                                                                           | 5.0E-4 |
| 2  | GO.0090116 | C-5 methylation of cytosine                                                                                  | 5.0E-4 |
| 2  | GO.1902263 | apoptotic process involved in embryonic digit morphogenesis                                                  | 5.0E-4 |
| 26 | GO.0007165 | signal transduction                                                                                          | 5.4E-4 |

|    |            |                                                                                         |        |
|----|------------|-----------------------------------------------------------------------------------------|--------|
| 3  | GO.0033032 | regulation of myeloid cell apoptotic process                                            | 5.4E-4 |
| 4  | GO.0048661 | positive regulation of smooth muscle cell proliferation                                 | 5.4E-4 |
| 3  | GO.0071549 | cellular response to dexamethasone stimulus                                             | 5.4E-4 |
| 6  | GO.1902105 | regulation of leukocyte differentiation                                                 | 5.5E-4 |
| 6  | GO.0009410 | response to xenobiotic stimulus                                                         | 5.6E-4 |
| 4  | GO.0030330 | DNA damage response, signal transduction by p53 class mediator                          | 5.8E-4 |
| 3  | GO.0048730 | epidermis morphogenesis                                                                 | 5.9E-4 |
| 4  | GO.0097306 | cellular response to alcohol                                                            | 6.0E-4 |
| 4  | GO.0048145 | regulation of fibroblast proliferation                                                  | 6.3E-4 |
| 10 | GO.0009887 | animal organ morphogenesis                                                              | 6.7E-4 |
| 27 | GO.0023052 | signaling                                                                               | 6.7E-4 |
| 3  | GO.0043500 | muscle adaptation                                                                       | 7.0E-4 |
| 3  | GO.0043516 | regulation of DNA damage response, signal transduction by p53 class mediator            | 7.0E-4 |
| 3  | GO.0045601 | regulation of endothelial cell differentiation                                          | 7.0E-4 |
| 2  | GO.0045636 | positive regulation of melanocyte differentiation                                       | 7.0E-4 |
| 2  | GO.0051097 | negative regulation of helicase activity                                                | 7.0E-4 |
| 5  | GO.2000377 | regulation of reactive oxygen species metabolic process                                 | 7.0E-4 |
| 4  | GO.0046620 | regulation of organ growth                                                              | 7.3E-4 |
| 7  | GO.0051090 | regulation of DNA-binding transcription factor activity                                 | 7.3E-4 |
| 3  | GO.0003203 | endocardial cushion morphogenesis                                                       | 7.5E-4 |
| 3  | GO.1904030 | negative regulation of cyclin-dependent protein kinase activity                         | 7.5E-4 |
| 5  | GO.0018105 | peptidyl-serine phosphorylation                                                         | 7.6E-4 |
| 6  | GO.0032102 | negative regulation of response to external stimulus                                    | 7.7E-4 |
| 4  | GO.0009791 | post-embryonic development                                                              | 7.8E-4 |
| 6  | GO.0071214 | cellular response to abiotic stimulus                                                   | 7.9E-4 |
| 3  | GO.0043029 | T cell homeostasis                                                                      | 8.0E-4 |
| 3  | GO.0048873 | homeostasis of number of cells within a tissue                                          | 8.0E-4 |
| 4  | GO.1904029 | regulation of cyclin-dependent protein kinase activity                                  | 8.4E-4 |
| 13 | GO.0042592 | homeostatic process                                                                     | 8.7E-4 |
| 4  | GO.0060070 | canonical Wnt signaling pathway                                                         | 8.7E-4 |
| 27 | GO.0007154 | cell communication                                                                      | 9.3E-4 |
| 3  | GO.0034405 | response to fluid shear stress                                                          | 9.3E-4 |
| 3  | GO.0110111 | negative regulation of animal organ morphogenesis                                       | 9.3E-4 |
| 2  | GO.1900378 | positive regulation of secondary metabolite biosynthetic process                        | 9.3E-4 |
| 6  | GO.0030111 | regulation of Wnt signaling pathway                                                     | 9.4E-4 |
| 4  | GO.0051153 | regulation of striated muscle cell differentiation                                      | 9.6E-4 |
| 3  | GO.0010907 | positive regulation of glucose metabolic process                                        | 9.8E-4 |
| 3  | GO.0014911 | positive regulation of smooth muscle cell migration                                     | 9.8E-4 |
| 3  | GO.0031062 | positive regulation of histone methylation                                              | 9.8E-4 |
| 3  | GO.1902042 | negative regulation of extrinsic apoptotic signaling pathway via death domain receptors | 9.8E-4 |
| 6  | GO.0001525 | angiogenesis                                                                            | 9.9E-4 |
| 14 | GO.0051049 | regulation of transport                                                                 | 9.9E-4 |
| 3  | GO.0042149 | cellular response to glucose starvation                                                 | 0.001  |
| 9  | GO.0051345 | positive regulation of hydrolase activity                                               | 0.001  |
| 5  | GO.0060485 | mesenchyme development                                                                  | 0.001  |

**Table S8.** Gene Ontology (GO) Molecular Function data enrichment analysis. Only the terms with FDR  $p$  value  $< 0.01$  were considered.

| Number of genes | Term name  | Description                                                              | FDR value |
|-----------------|------------|--------------------------------------------------------------------------|-----------|
| 14              | GO.0003682 | chromatin binding                                                        | 5,52E-09  |
| 42              | GO.0005515 | protein binding                                                          | 5,52E-09  |
| 19              | GO.0043565 | sequence-specific DNA binding                                            | 5,52E-09  |
| 17              | GO.0044212 | transcription regulatory region DNA binding                              | 5,52E-09  |
| 52              | GO.0005488 | binding                                                                  | 7,02E-09  |
| 15              | GO.0000976 | transcription regulatory region sequence-specific DNA binding            | 2,23E-08  |
| 15              | GO.0019904 | protein domain specific binding                                          | 2,23E-08  |
| 23              | GO.0140110 | transcription regulator activity                                         | 3,72E-08  |
| 14              | GO.0000977 | RNA polymerase II regulatory region sequence-specific DNA binding        | 4,83E-08  |
| 21              | GO.0003700 | DNA-binding transcription factor activity                                | 5,19E-08  |
| 12              | GO.0000987 | proximal promoter sequence-specific DNA binding                          | 1,14E-07  |
| 24              | GO.0003677 | DNA binding                                                              | 1,14E-07  |
| 27              | GO.0003676 | nucleic acid binding                                                     | 3,60E-07  |
| 22              | GO.0019899 | enzyme binding                                                           | 3,72E-07  |
| 34              | GO.1901363 | heterocyclic compound binding                                            | 3,81E-07  |
| 19              | GO.0000981 | DNA-binding transcription factor activity, RNA polymerase II-specific    | 4,35E-07  |
| 34              | GO.0097159 | organic cyclic compound binding                                          | 5,09E-07  |
| 11              | GO.0000978 | RNA polymerase II proximal promoter sequence-specific DNA binding        | 6,26E-07  |
| 12              | GO.0008134 | transcription factor binding                                             | 1,15E-06  |
| 5               | GO.1990841 | promoter-specific chromatin binding                                      | 2,73E-06  |
| 11              | GO.0019901 | protein kinase binding                                                   | 7.86E-6   |
| 9               | GO.0001228 | DNA-binding transcription activator activity, RNA polymerase II-specific | 2.13E-5   |
| 4               | GO.0051721 | protein phosphatase 2A binding                                           | 2.3E-5    |
| 26              | GO.0046872 | metal ion binding                                                        | 5.93E-5   |
| 18              | GO.0140096 | catalytic activity, acting on a protein                                  | 1.0E-4    |
| 5               | GO.0042826 | histone deacetylase binding                                              | 1.6E-4    |
| 5               | GO.0019903 | protein phosphatase binding                                              | 2.5E-4    |
| 4               | GO.0002039 | p53 binding                                                              | 5.6E-4    |
| 2               | GO.0003886 | DNA (cytosine-5-)-methyltransferase activity                             | 7.0E-4    |
| 3               | GO.0035035 | histone acetyltransferase binding                                        | 7.0E-4    |
| 2               | GO.0050816 | phosphothreonine residue binding                                         | 7.0E-4    |
| 4               | GO.0008013 | beta-catenin binding                                                     | 7.7E-4    |
| 3               | GO.0016538 | cyclin-dependent protein serine/threonine kinase regulator activity      | 9.0E-4    |
| 30              | GO.0043167 | ion binding                                                              | 9.0E-4    |
| 2               | GO.0071535 | RING-like zinc finger domain binding                                     | 0.0012    |
| 14              | GO.0042802 | identical protein binding                                                | 0.0014    |
| 16              | GO.0016740 | transferase activity                                                     | 0.0016    |
| 10              | GO.0044877 | protein-containing complex binding                                       | 0.0019    |
| 2               | GO.0001134 | transcription regulator recruiting activity                              | 0.0034    |
| 10              | GO.0046914 | transition metal ion binding                                             | 0.0034    |
| 4               | GO.0002020 | protease binding                                                         | 0.0038    |
| 3               | GO.0097110 | scaffold protein binding                                                 | 0.0039    |
| 2               | GO.0004861 | cyclin-dependent protein serine/threonine kinase inhibitor activity      | 0.0043    |
| 2               | GO.0000900 | translation repressor activity, mRNA regulatory element binding          | 0.0049    |
| 6               | GO.0004674 | protein serine/threonine kinase activity                                 | 0.0085    |
| 8               | GO.0008270 | zinc ion binding                                                         | 0.0088    |
| 9               | GO.0030234 | enzyme regulator activity                                                | 0.0098    |
| 5               | GO.0031625 | ubiquitin protein ligase binding                                         | 0.0099    |
